# Supplementary material for: A Multimodal Imaging–Based Deep Learning Model for Detecting Treatment-Requiring Retinal Vascular Diseases: Model Development and Validation Study
Source: PubMed Central journal article supplement (PMC8204240; doi:10.2196/28868), 2021-05-31
Supplement: medinform_v9i5e28868_app2.pdf [file medinform_v9i5e28868_app2.pdf]

(A)

| Fold     | Learning Rate | Batch Size | Disease Accuracy | Severity AUC |
|----------|---------------|------------|------------------|--------------|
| 0        | 5.e-5         | 16         | 0.902            | 0.955        |
| <b>1</b> | <b>5e-5</b>   | <b>16</b>  | <b>0.927</b>     | <b>0.967</b> |
| 2        | 5e-5          | 16         | 0.902            | 0.966        |
| 0        | 1e-4          | 16         | 0.906            | 0.965        |
| 1        | 1e-4          | 16         | 0.909            | 0.957        |
| 2        | 1e-4          | 16         | 0.89             | 0.951        |
| 0        | 1e-5          | 16         | 0.869            | 0.954        |
| 1        | 1e-5          | 16         | 0.895            | 0.96         |
| 2        | 1e-5          | 16         | 0.864            | 0.942        |

(B)

| Fold     | Learning Rate | Batch Size | Disease Accuracy | Severity AUC |
|----------|---------------|------------|------------------|--------------|
| 0        | 5e-5          | 8          | 0.759            | 0.907        |
| 1        | 5e-5          | 8          | 0.892            | 0.959        |
| 2        | 5e-5          | 8          | 0.834            | 0.891        |
| 0        | 5e-5          | 12         | 0.838            | 0.948        |
| 1        | 5e-5          | 12         | 0.892            | 0.959        |
| 2        | 5e-5          | 12         | 0.899            | 0.955        |
| 0        | 5e-5          | 16         | 0.902            | 0.955        |
| <b>1</b> | <b>5e-5</b>   | <b>16</b>  | <b>0.927</b>     | <b>0.967</b> |
| 2        | 5e-5          | 16         | 0.902            | 0.966        |
